# Supplementary material for: Aqueous complexation of citrate with neodymium(iii) and americium(iii): a study by potentiometry, absorption spectrophotometry, microcalorimetry, and XAFS
Source: Royal Society of Chemistry journal article supplement (doi:10.1039/c4dt00343h), 2014-01-01
Supplement: c4dt00343h1.pdf [file c4dt00343h1.pdf]

Supporting Information

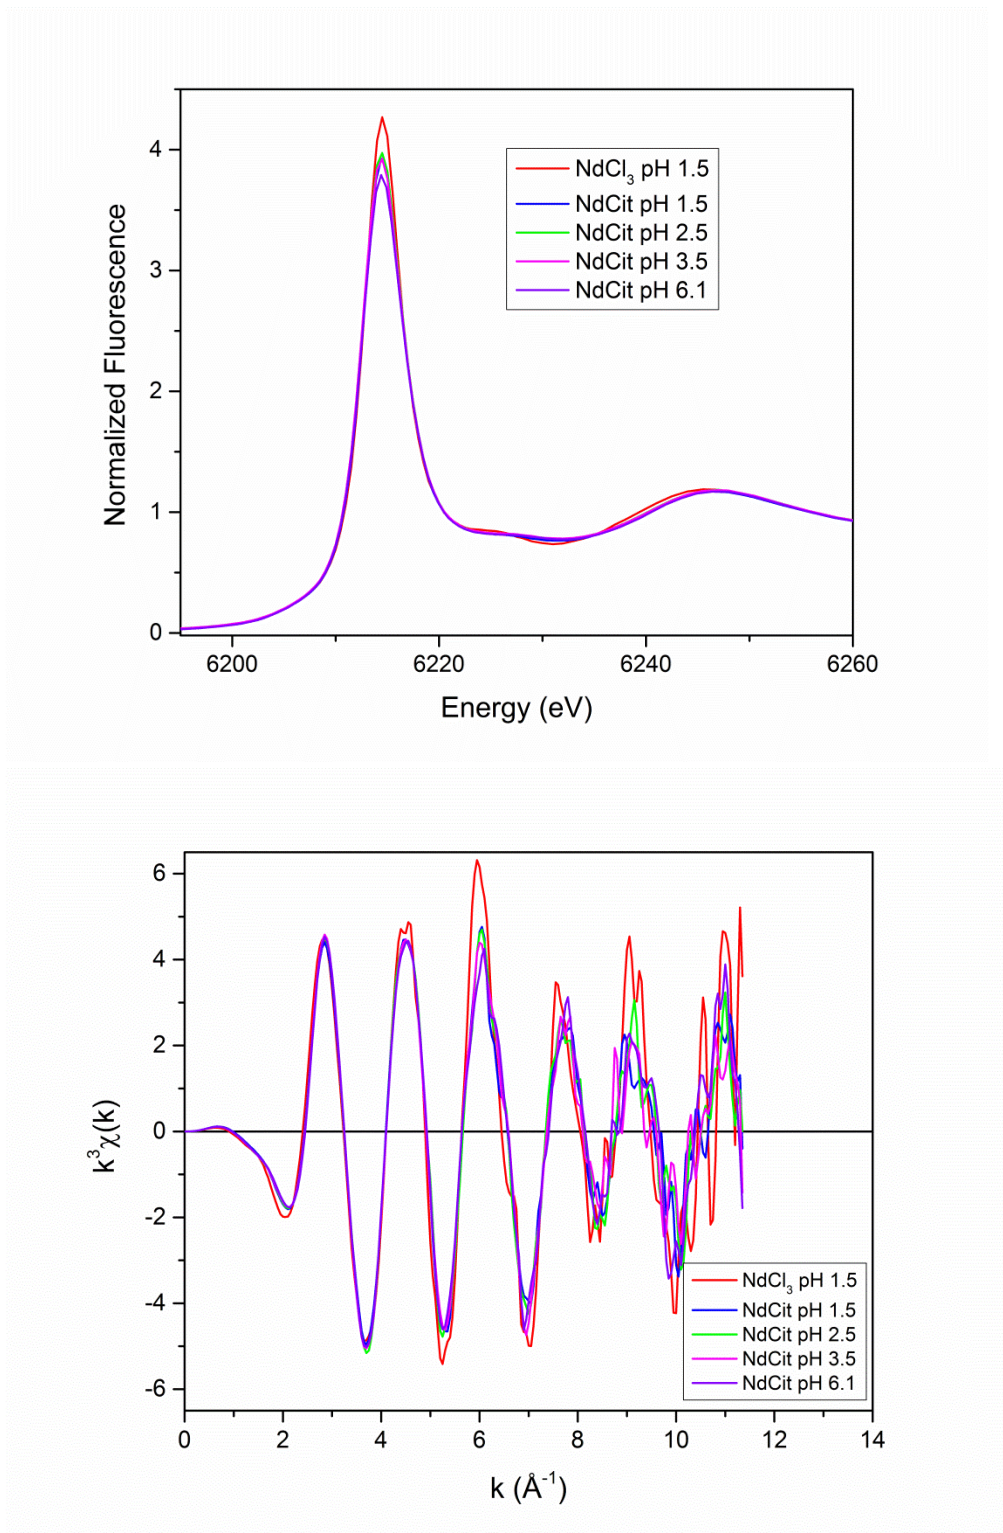

Fig. S1 – Nd L<sub>3</sub> edge fluorescence spectra (top) and  $\chi(k)$  (bottom) for a NdCl<sub>3</sub> solution and Nd(III)-Citrate (pH 1.5 - 6.1).

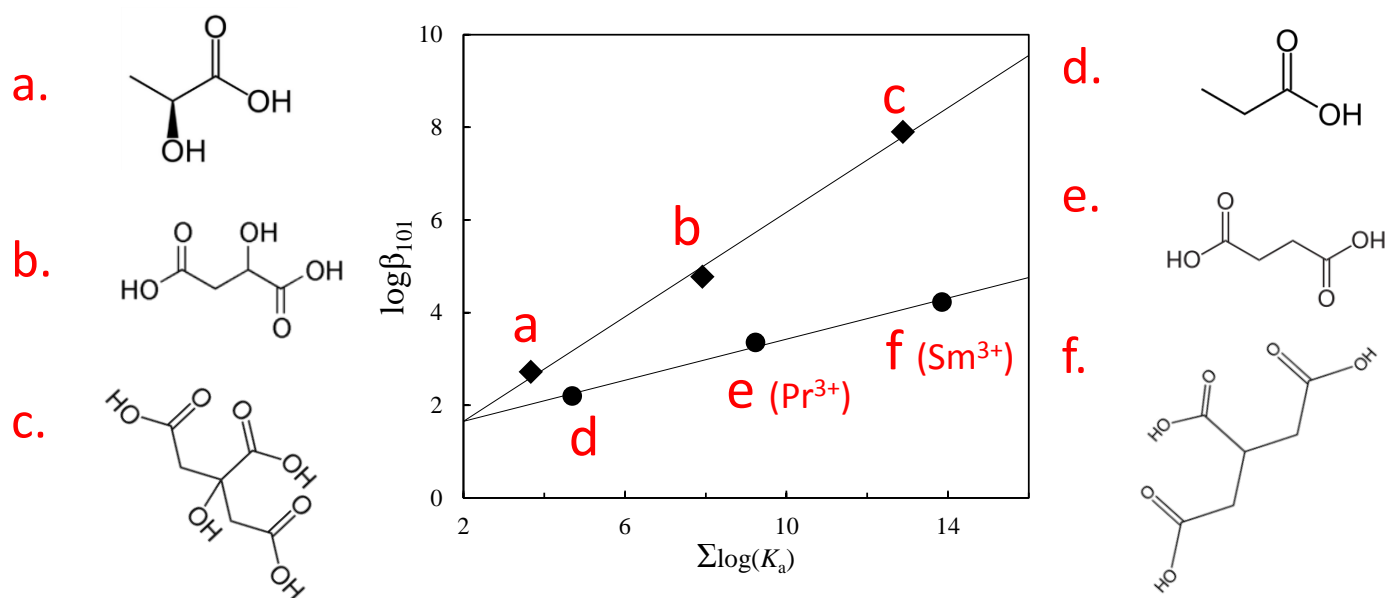

Fig. S2 Stability constants for the selected ligands and lanthanides;  $I = 0.1\text{M Na}^+$ ;  $25^\circ\text{C}$ ; constants for  $\text{Nd}^{3+}$  unless otherwise noted; taken from NIST database. The chemical structures are **a.** lactic acid, **b.** malic acid, **c.** citric acid, **d.** propanoic acid, **e.** succinic acid, **f.** tricarballic acid

## Supporting Information

| mmol Nd      | 0.04855  |          |          |          |
|--------------|----------|----------|----------|----------|
| mmol Cit     | 0.1931   |          |          |          |
| mmol H       | 0.5793   |          |          |          |
| V0           | 1.25 mL  |          |          |          |
| Titrant      | Na3Cit   |          |          |          |
| [Titrant]    | 0.1665   |          |          |          |
| Temp         | 25.0 C   |          |          |          |
| Pathlength   | 1 cm     |          |          |          |
| Titrant (mL) | 570 nm   | 575 nm   | 580 nm   | 585 nm   |
| 0.08         | 4.08E-02 | 1.06E-01 | 2.03E-01 | 8.80E-02 |
| 0.16         | 3.78E-02 | 1.09E-01 | 2.13E-01 | 9.69E-02 |
| 0.24         | 3.51E-02 | 1.11E-01 | 2.24E-01 | 1.08E-01 |
| 0.32         | 3.26E-02 | 1.13E-01 | 2.31E-01 | 1.17E-01 |
| 0.4          | 3.03E-02 | 1.16E-01 | 2.34E-01 | 1.24E-01 |
| 0.48         | 2.83E-02 | 1.18E-01 | 2.34E-01 | 1.29E-01 |
| 0.56         | 2.66E-02 | 1.21E-01 | 2.32E-01 | 1.31E-01 |
| 0.64         | 2.50E-02 | 1.24E-01 | 2.28E-01 | 1.32E-01 |
| 0.72         | 2.37E-02 | 1.27E-01 | 2.23E-01 | 1.31E-01 |
| 0.8          | 2.26E-02 | 1.31E-01 | 2.18E-01 | 1.30E-01 |
| 0.88         | 2.17E-02 | 1.34E-01 | 2.13E-01 | 1.29E-01 |
| 0.96         | 2.06E-02 | 1.39E-01 | 2.08E-01 | 1.26E-01 |
| 1.04         | 1.96E-02 | 1.43E-01 | 2.03E-01 | 1.24E-01 |
| 1.12         | 1.87E-02 | 1.48E-01 | 1.98E-01 | 1.22E-01 |
| 1.2          | 1.79E-02 | 1.53E-01 | 1.94E-01 | 1.20E-01 |
| 1.28         | 1.73E-02 | 1.58E-01 | 1.90E-01 | 1.17E-01 |
| 1.36         | 1.67E-02 | 1.64E-01 | 1.86E-01 | 1.15E-01 |
| 1.44         | 1.62E-02 | 1.71E-01 | 1.82E-01 | 1.13E-01 |
| 1.52         | 1.57E-02 | 1.78E-01 | 1.78E-01 | 1.11E-01 |
| 1.6          | 1.53E-02 | 1.87E-01 | 1.75E-01 | 1.09E-01 |
| 1.68         | 1.48E-02 | 1.96E-01 | 1.72E-01 | 1.07E-01 |
| 1.76         | 1.45E-02 | 2.08E-01 | 1.68E-01 | 1.05E-01 |
| 1.84         | 1.42E-02 | 2.20E-01 | 1.65E-01 | 1.03E-01 |
| 1.92         | 1.36E-02 | 2.34E-01 | 1.62E-01 | 1.01E-01 |

Fig S3: Experimental data for the spectrophotometric titration in Figure 2 with absorbances at selected wavelengths. The refinement parameters employed wavelengths between 550 – 620 at 0.1 nm increments.

Supporting Information

mmol Nd 1.072  
 mmol Cit 4.400  
 mmol H 13.200  
 mmol NO<sub>3</sub> 3.216  
 V<sub>0</sub> 80 mL  
 Titrant NaOH  
 [Titrant] 0.2088  
 Temp 25.0 C  
 E<sub>0</sub> 414.4 ± 0.4  
 slope 1.005

| Titrant (mL) | p[H]   |
|--------------|--------|--------------|--------|--------------|--------|--------------|--------|--------------|--------|--------------|--------|
| 0            | 1.798  | 7.5          | 2.1092 | 15           | 2.449  | 22.5         | 2.8005 | 30           | 3.1806 | 37.5         | 3.5978 |
| 0.3          | 1.8064 | 7.8          | 2.1227 | 15.3         | 2.4624 | 22.8         | 2.8156 | 30.3         | 3.1991 | 37.8         | 3.6146 |
| 0.6          | 1.8165 | 8.1          | 2.1361 | 15.6         | 2.4759 | 23.1         | 2.8291 | 30.6         | 3.2143 | 38.1         | 3.6331 |
| 0.9          | 1.8283 | 8.4          | 2.1496 | 15.9         | 2.4893 | 23.4         | 2.8425 | 30.9         | 3.2294 | 38.4         | 3.6499 |
| 1.2          | 1.8418 | 8.7          | 2.163  | 16.2         | 2.5028 | 23.7         | 2.8577 | 31.2         | 3.2462 | 38.7         | 3.6667 |
| 1.5          | 1.8535 | 9            | 2.1765 | 16.5         | 2.5162 | 24           | 2.8728 | 31.5         | 3.263  | 39           | 3.6852 |
| 1.8          | 1.8653 | 9.3          | 2.1899 | 16.8         | 2.5297 | 24.3         | 2.888  | 31.8         | 3.2782 | 39.3         | 3.702  |
| 2.1          | 1.8771 | 9.6          | 2.2034 | 17.1         | 2.5448 | 24.6         | 2.9031 | 32.1         | 3.295  | 39.6         | 3.7189 |
| 2.4          | 1.8889 | 9.9          | 2.2169 | 17.4         | 2.5583 | 24.9         | 2.9182 | 32.4         | 3.3118 | 39.9         | 3.7374 |
| 2.7          | 1.9023 | 10.2         | 2.232  | 17.7         | 2.5717 | 25.2         | 2.9317 | 32.7         | 3.3286 | 40.2         | 3.7559 |
| 3            | 1.9141 | 10.5         | 2.2438 | 18           | 2.5869 | 25.5         | 2.9468 | 33           | 3.3455 | 40.5         | 3.7744 |
| 3.3          | 1.9276 | 10.8         | 2.2572 | 18.3         | 2.6003 | 25.8         | 2.962  | 33.3         | 3.3623 | 40.8         | 3.7895 |
| 3.6          | 1.9393 | 11.1         | 2.2707 | 18.6         | 2.6138 | 26.1         | 2.9771 | 33.6         | 3.3774 | 41.1         | 3.808  |
| 3.9          | 1.9511 | 11.4         | 2.2841 | 18.9         | 2.6273 | 26.4         | 2.9939 | 33.9         | 3.3942 | 41.4         | 3.8265 |
| 4.2          | 1.9646 | 11.7         | 2.2976 | 19.2         | 2.6424 | 26.7         | 3.0091 | 34.2         | 3.4111 | 41.7         | 3.8433 |
| 4.5          | 1.978  | 12           | 2.311  | 19.5         | 2.6558 | 27           | 3.0242 | 34.5         | 3.4279 | 42           | 3.8601 |
| 4.8          | 1.9915 | 12.3         | 2.3245 | 19.8         | 2.671  | 27.3         | 3.0393 | 34.8         | 3.4447 | 42.3         | 3.8786 |
| 5.1          | 2.0032 | 12.6         | 2.3396 | 20.1         | 2.6861 | 27.6         | 3.0545 | 35.1         | 3.4615 | 42.6         | 3.8972 |
| 5.4          | 2.0167 | 12.9         | 2.3514 | 20.4         | 2.6996 | 27.9         | 3.0696 | 35.4         | 3.4783 | 42.9         | 3.9157 |
| 5.7          | 2.0302 | 13.2         | 2.3665 | 20.7         | 2.713  | 28.2         | 3.0848 | 35.7         | 3.4952 | 43.2         | 3.9342 |
| 6            | 2.0436 | 13.5         | 2.3783 | 21           | 2.7282 | 28.5         | 3.1016 | 36           | 3.512  | 43.5         | 3.951  |
| 6.3          | 2.0571 | 13.8         | 2.3935 | 21.3         | 2.7416 | 28.8         | 3.1167 | 36.3         | 3.5288 | 43.8         | 3.9695 |
| 6.6          | 2.0688 | 14.1         | 2.4069 | 21.6         | 2.7568 | 29.1         | 3.1335 | 36.6         | 3.5456 | 44.1         | 3.988  |
| 6.9          | 2.0823 | 14.4         | 2.4204 | 21.9         | 2.7719 | 29.4         | 3.1487 | 36.9         | 3.5641 | 44.4         | 4.0065 |
| 7.2          | 2.0957 | 14.7         | 2.4338 | 22.2         | 2.7854 | 29.7         | 3.1655 | 37.2         | 3.5793 | 44.7         | 4.025  |

Fig S4: Experimental data for the potentiometric titration in Figure 1.
